# Supplementary material for: Genetic analysis of two species of Mnomen in the Kalamazoo Watershed reveal panmixia in Z. Aquatica, structure among Z. Palustris, and hybridization in areas of sympatry
Source: PeerJ. 2023 Nov 2;11:e15971. doi: 10.7717/peerj.15971 (PMC10625758; doi:10.7717/peerj.15971)
Supplement: Supplemental Information 1 [file peerj-11-15971-s001.xlsx]

## Sheet: Rice Template
11	86	2	59	27	1	86
RiceTemplate			Pop1	Pop2		Region1
Sample	Pop	zm30		zt18		zm26		zt1		zm44		zm36		Zt22		ZT13		ZM25		zm40		zm35
fa10l	AQ	214	264	100	100	178	180	270	270	250	250	214	374	256	256	180	180	138	142	300	394	214	370
fa11l	AQ	214	264	100	100	178	180	300	394	250	250	214	266	218	252	178	184	170	170	300	378	214	370
fa3l	AQ	214	264	100	100	178	180	296	394	250	250	214	266	256	256	178	178	186	260	296	376	214	370
fa4l	AQ	214	292	100	100	178	180	270	270	214	250	214	266	238	238	174	174	268	268	296	374	214	374
fa5l	AQ	214	264	100	100	178	180	270	270	250	250	214	266	254	254	178	182	130	178	300	384	300	370
fa9l	AQ	214	264	100	100	178	180	270	270	250	250	214	266	178	246	178	178	138	144	296	380	214	394
ka299	AQ	214	264	100	100	178	180	300	380	250	250	214	278	194	202	180	180	-9999	-9999	300	380	300	300
ka399	AQ	214	284	100	100	178	180	298	380	250	250	-9999	-9999	194	202	180	180	136	144	300	380	370	374
kr499	AQ	214	266	100	100	178	180	300	394	250	250	214	298	194	202	182	182	170	170	300	394	300	370
kr599	AQ	214	284	100	100	178	180	-9999	-9999	250	250	214	266	194	202	180	180	144	170	300	394	-9999	-9999
na10l831	AQ	214	264	100	100	178	180	346	370	250	250	214	266	194	202	180	184	-9999	-9999	-9999	-9999	214	214
na10l	AQ	214	284	100	100	178	180	328	370	208	250	-9999	-9999	236	260	180	180	170	170	300	368	312	370
na11l	AQ	214	284	-9999	-9999	178	180	374	374	214	250	214	266	194	202	180	180	170	170	374	374	236	374
na12l	AQ	214	284	100	100	178	180	376	376	214	250	214	266	216	246	180	180	-9999	-9999	374	374	300	374
na13l	AQ	214	284	100	100	178	180	376	376	250	250	214	370	-9999	-9999	-9999	-9999	268	324	374	374	394	394
na14l	AQ	214	284	100	100	178	180	370	376	214	250	214	370	196	256	174	182	138	144	374	374	351	374
na15	AQ	214	266	98	100	-9999	-9999	370	394	214	250	214	394	194	202	-9999	-9999	170	170	300	394	300	380
na15l	AQ	214	292	100	100	178	180	380	394	250	250	214	266	194	202	180	180	-9999	-9999	266	390	270	270
na16l	AQ	214	284	100	100	178	180	376	394	250	250	214	266	194	202	176	178	170	170	220	220	314	374
na18l	AQ	214	284	100	100	178	180	266	394	250	250	214	266	226	252	178	178	144	170	266	394	300	300
na19l	AQ	214	284	98	100	178	180	376	376	250	250	214	266	-9999	-9999	178	178	136	144	-9999	-9999	218	374
na1l831	AQ	214	284	100	100	178	180	264	300	250	250	216	266	220	220	178	178	138	142	300	394	312	214
na20l	AQ	214	298	100	100	178	180	296	376	250	250	214	266	224	224	174	180	138	142	298	374	214	374
na21l	AQ	214	284	100	100	178	180	300	394	250	250	214	266	226	260	176	176	170	180	300	394	374	394
na22l	AQ	214	264	100	100	178	180	300	394	250	250	-9999	-9999	226	268	178	178	170	170	300	394	388	394
na23l	AQ	214	284	100	100	178	180	266	266	250	250	214	214	194	202	178	182	156	170	214	266	290	374
na24l	AQ	214	284	-9999	-9999	178	180	300	390	214	250	214	232	210	230	178	178	170	170	214	300	300	394
na25l	AQ	214	284	100	100	178	180	266	300	250	250	214	224	236	236	184	184	180	180	300	374	236	236
na27l	AQ	214	264	98	98	178	180	300	394	250	250	214	266	222	222	178	184	170	170	300	394	266	294
na28l	AQ	214	264	100	100	178	180	300	394	250	250	214	266	216	216	174	182	170	268	300	394	300	394
na29l	AQ	214	284	100	100	178	180	300	394	214	250	214	374	220	220	178	178	170	188	300	394	214	394
na2l831	AQ	214	284	100	100	178	180	264	300	250	250	214	274	236	256	178	178	136	170	300	394	300	394
na2l	AQ	214	264	100	100	178	180	270	270	250	250	214	266	194	202	178	178	170	180	300	394	394	300
na30	AQ	214	284	100	100	178	180	-9999	-9999	250	250	214	266	222	222	180	180	150	170	276	374	374	394
na31l	AQ	214	292	100	100	178	180	296	394	250	250	214	266	202	212	178	178	170	268	296	374	214	370
na33l	AQ	214	274	98	100	178	180	274	370	250	250	214	266	226	226	174	182	170	170	320	374	206	218
na36l	AQ	214	284	98	100	178	180	274	300	250	250	214	266	194	202	178	178	170	170	320	374	218	236
na37	AQ	214	284	98	100	178	180	300	394	-9999	-9999	-9999	-9999	170	252	174	174	170	268	300	394	236	394
na3l831	AQ	214	284	100	100	178	180	264	370	250	250	300	396	216	226	178	178	172	216	300	368	300	394
na4l831	AQ	214	284	100	100	178	180	300	394	250	250	214	266	200	210	174	182	152	170	300	300	300	370
na4l	AQ	214	284	100	100	178	180	300	394	250	250	214	370	194	202	178	178	170	216	300	394	236	236
na5l831	AQ	214	284	98	100	178	180	302	376	250	250	214	326	194	202	174	182	170	170	296	374	214	374
na5l	AQ	214	266	100	100	178	180	388	388	250	250	214	394	220	238	174	182	130	170	374	374	374	394
na6l831	AQ	214	284	100	100	178	180	270	270	214	250	214	266	194	202	174	174	170	180	300	374	236	374
na6l	AQ	214	284	100	100	178	180	274	274	214	250	214	214	230	230	178	184	-9999	-9999	300	374	214	370
na7l831	AQ	214	266	100	100	178	180	258	310	250	250	214	266	194	202	178	184	170	180	300	374	218	218
na7l	AQ	214	266	100	100	178	180	274	352	214	250	214	266	194	202	178	184	138	170	266	274	214	270
na8l831	AQ	214	274	100	100	178	180	274	308	250	250	214	274	248	270	180	180	170	216	274	308	236	352
na8l	AQ	214	284	100	100	178	180	326	332	250	250	214	266	194	202	178	178	138	142	374	374	217	292
na9l831	AQ	214	284	100	122	178	180	370	370	214	250	214	266	224	252	180	180	324	324	336	364	328	370
na9l	AQ	214	284	98	98	178	180	370	370	250	250	-9999	-9999	194	202	174	174	136	142	368	368	214	370
ra1	AQ	214	284	100	100	178	180	300	394	214	250	214	320	194	202	174	174	-9999	-9999	300	370	214	394
ra2l	AQ	214	266	100	100	178	180	300	394	250	250	214	266	194	202	174	174	136	144	394	394	214	214
ra3l	AQ	214	262	100	100	178	180	300	394	250	250	214	250	-9999	-9999	-9999	-9999	138	142	300	394	370	394
rp1	AQ	214	284	100	100	178	180	296	370	250	250	214	266	238	238	-9999	-9999	138	142	260	260	214	394
rp2	AQ	214	284	100	128	180	180	274	312	214	214	214	266	194	194	-9999	-9999	138	142	296	394	214	308
rp3	AQ	214	284	98	98	178	180	274	394	214	214	214	266	200	200	-9999	-9999	150	150	296	394	394	370
gp1099	PA	214	292	90	100	178	180	370	370	250	250	214	266	254	254	178	184	152	170	368	374	328	374
gp1199	PA	214	284	100	100	182	182	370	370	250	250	214	266	224	224	142	144	-9999	-9999	286	368	214	370
gp1299	PA	214	268	100	100	182	182	370	370	250	250	288	370	218	218	140	140	-9999	-9999	-9999	-9999	232	380
gp1399	PA	214	284	100	100	182	182	290	370	250	250	214	266	194	194	140	140	138	142	368	368	214	266
gp1499	PA	214	267	98	98	182	182	370	374	250	250	214	266	212	212	140	140	138	142	368	374	374	394
gp1	PA	214	264	98	98	182	182	394	394	250	250	214	370	214	226	144	184	138	142	394	394	214	374
gp299	PA	214	267	100	100	182	182	370	374	198	214	-9999	-9999	224	224	140	140	138	142	368	374	232	232
gp499	PA	214	284	100	100	182	182	370	374	198	214	214	266	238	238	140	184	138	142	374	394	-9999	-9999
gp599	PA	214	267	100	100	178	180	370	370	214	214	214	214	176	228	178	180	116	116	368	394	-9999	-9999
gp799	PA	200	214	100	104	178	180	300	370	250	250	214	266	194	194	178	184	130	172	300	368	-9999	-9999
gp999	PA	214	284	100	100	178	180	270	270	-9999	-9999	-9999	-9999	175	254	178	178	138	142	300	368	202	202
krp1	PA	214	284	100	100	178	180	276	394	214	214	214	214	200	208	-9999	-9999	138	142	296	380	266	276
krp2	PA	214	284	100	100	178	180	394	394	250	250	214	214	202	224	-9999	-9999	138	142	296	394	236	374
krp3	PA	214	284	98	98	178	180	298	394	250	250	214	230	-9999	-9999	-9999	-9999	138	142	296	394	312	370
krp4	PA	214	284	100	100	178	180	394	394	250	250	214	224	208	208	-9999	-9999	138	142	394	394	-9999	-9999
krp6	PA	214	284	100	100	178	180	296	394	250	250	216	222	-9999	-9999	-9999	-9999	138	142	380	394	266	380
pa12l	PA	214	284	100	100	178	180	300	394	250	250	214	266	194	202	174	174	142	170	300	394	300	394
pa13l	PA	214	284	-9999	-9999	178	180	286	294	250	250	214	266	174	228	178	178	170	170	300	394	300	394
pa14l	PA	214	284	100	100	178	180	300	394	250	250	-9999	-9999	194	202	178	178	170	170	214	238	370	394
pa15l	PA	214	284	100	100	178	180	326	332	214	214	214	214	226	248	178	178	170	268	326	330	218	332
pa16l	PA	214	284	100	100	178	180	300	394	214	250	214	266	226	226	178	184	170	238	300	394	370	394
pa1l	PA	214	284	100	100	178	180	300	394	214	214	214	266	202	210	178	184	170	170	276	370	214	394
pa2l	PA	214	284	100	100	178	180	300	394	214	214	214	214	240	240	178	178	170	170	300	394	286	370
pa4l	PA	214	284	98	100	178	180	328	394	214	250	214	370	202	208	184	184	170	268	220	220	-9999	-9999
pa5l	PA	214	284	100	100	178	180	266	296	214	214	214	250	194	202	178	194	170	170	296	394	296	394
pa6l	PA	214	274	100	100	178	180	274	370	214	214	214	266	226	226	180	184	170	266	274	370	214	214
pa7l	PA	214	284	100	100	178	180	300	394	250	250	-9999	-9999	194	202	178	178	110	170	300	394	300	394
pa8l	PA	214	284	100	100	178	180	300	394	250	250	214	266	-9999	-9999	-9999	-9999	170	170	300	394	374	394
pa9l	PA	214	264	100	100	178	180	266	390	214	250	214	266	100	100	-9999	-9999	138	142	300	390	216	398

## Sheet: AQ_Rice D
11	57	1	57	1	57
AQtemplate			Pop1		Region1
Sample	Pop	zm30		zt18		zm26		zt1		zm44		zm36		Zt22		ZT13		ZM25		zm40		zm35
fa10l	AQ	214	264	100	100	178	180	270	270	250	250	214	374	256	256	180	180	138	142	300	394	214	370
fa11l	AQ	214	264	100	100	178	180	300	394	250	250	214	266	218	252	178	184	170	170	300	378	214	370
fa3l	AQ	214	264	100	100	178	180	296	394	250	250	214	266	256	256	178	178	186	260	296	376	214	370
fa4l	AQ	214	292	100	100	178	180	270	270	214	250	214	266	238	238	174	174	268	268	296	374	214	374
fa5l	AQ	214	264	100	100	178	180	270	270	250	250	214	266	254	254	178	182	130	178	300	384	300	370
fa9l	AQ	214	264	100	100	178	180	270	270	250	250	214	266	178	246	178	178	138	144	296	380	214	394
ka299	AQ	214	264	100	100	178	180	300	380	250	250	214	278	194	202	180	180	-9999	-9999	300	380	300	300
ka399	AQ	214	284	100	100	178	180	298	380	250	250	-9999	-9999	194	202	180	180	136	144	300	380	370	374
kr499	AQ	214	266	100	100	178	180	300	394	250	250	214	298	194	202	182	182	170	170	300	394	300	370
kr599	AQ	214	284	100	100	178	180	-9999	-9999	250	250	214	266	194	202	180	180	144	170	300	394	-9999	-9999
na10l831	AQ	214	264	100	100	178	180	346	370	250	250	214	266	194	202	180	184	-9999	-9999	-9999	-9999	214	214
na10l	AQ	214	284	100	100	178	180	328	370	208	250	-9999	-9999	236	260	180	180	170	170	300	368	312	370
na11l	AQ	214	284	-9999	-9999	178	180	374	374	214	250	214	266	194	202	180	180	170	170	374	374	236	374
na12l	AQ	214	284	100	100	178	180	376	376	214	250	214	266	216	246	180	180	-9999	-9999	374	374	300	374
na13l	AQ	214	284	100	100	178	180	376	376	250	250	214	370	-9999	-9999	-9999	-9999	268	324	374	374	394	394
na14l	AQ	214	284	100	100	178	180	370	376	214	250	214	370	196	256	174	182	138	144	374	374	351	374
na15	AQ	214	266	98	100	-9999	-9999	370	394	214	250	214	394	194	202	-9999	-9999	170	170	300	394	300	380
na15l	AQ	214	292	100	100	178	180	380	394	250	250	214	266	194	202	180	180	-9999	-9999	266	390	270	270
na16l	AQ	214	284	100	100	178	180	376	394	250	250	214	266	194	202	176	178	170	170	220	220	314	374
na18l	AQ	214	284	100	100	178	180	266	394	250	250	214	266	226	252	178	178	144	170	266	394	300	300
na19l	AQ	214	284	98	100	178	180	376	376	250	250	214	266	-9999	-9999	178	178	136	144	-9999	-9999	218	374
na1l831	AQ	214	284	100	100	178	180	264	300	250	250	216	266	220	220	178	178	138	142	300	394	312	214
na20l	AQ	214	298	100	100	178	180	296	376	250	250	214	266	224	224	174	180	138	142	298	374	214	374
na21l	AQ	214	284	100	100	178	180	300	394	250	250	214	266	226	260	176	176	170	180	300	394	374	394
na22l	AQ	214	264	100	100	178	180	300	394	250	250	-9999	-9999	226	268	178	178	170	170	300	394	388	394
na23l	AQ	214	284	100	100	178	180	266	266	250	250	214	214	194	202	178	182	156	170	214	266	290	374
na24l	AQ	214	284	-9999	-9999	178	180	300	390	214	250	214	232	210	230	178	178	170	170	214	300	300	394
na25l	AQ	214	284	100	100	178	180	266	300	250	250	214	224	236	236	184	184	180	180	300	374	236	236
na27l	AQ	214	264	98	98	178	180	300	394	250	250	214	266	222	222	178	184	170	170	300	394	266	294
na28l	AQ	214	264	100	100	178	180	300	394	250	250	214	266	216	216	174	182	170	268	300	394	300	394
na29l	AQ	214	284	100	100	178	180	300	394	214	250	214	374	220	220	178	178	170	188	300	394	214	394
na2l831	AQ	214	284	100	100	178	180	264	300	250	250	214	274	236	256	178	178	136	170	300	394	300	394
na2l	AQ	214	264	100	100	178	180	270	270	250	250	214	266	194	202	178	178	170	180	300	394	394	300
na30	AQ	214	284	100	100	178	180	-9999	-9999	250	250	214	266	222	222	180	180	150	170	276	374	374	394
na31l	AQ	214	292	100	100	178	180	296	394	250	250	214	266	202	212	178	178	170	268	296	374	214	370
na33l	AQ	214	274	98	100	178	180	274	370	250	250	214	266	226	226	174	182	170	170	320	374	206	218
na36l	AQ	214	284	98	100	178	180	274	300	250	250	214	266	194	202	178	178	170	170	320	374	218	236
na37	AQ	214	284	98	100	178	180	300	394	-9999	-9999	-9999	-9999	170	252	174	174	170	268	300	394	236	394
na3l831	AQ	214	284	100	100	178	180	264	370	250	250	300	396	216	226	178	178	172	216	300	368	300	394
na4l831	AQ	214	284	100	100	178	180	300	394	250	250	214	266	200	210	174	182	152	170	300	300	300	370
na4l	AQ	214	284	100	100	178	180	300	394	250	250	214	370	194	202	178	178	170	216	300	394	236	236
na5l831	AQ	214	284	98	100	178	180	302	376	250	250	214	326	194	202	174	182	170	170	296	374	214	374
na5l	AQ	214	266	100	100	178	180	388	388	250	250	214	394	220	238	174	182	130	170	374	374	374	394
na6l831	AQ	214	284	100	100	178	180	270	270	214	250	214	266	194	202	174	174	170	180	300	374	236	374
na6l	AQ	214	284	100	100	178	180	274	274	214	250	214	214	230	230	178	184	-9999	-9999	300	374	214	370
na7l831	AQ	214	266	100	100	178	180	258	310	250	250	214	266	194	202	178	184	170	180	300	374	218	218
na7l	AQ	214	266	100	100	178	180	274	352	214	250	214	266	194	202	178	184	138	170	266	274	214	270
na8l831	AQ	214	274	100	100	178	180	274	308	250	250	214	274	248	270	180	180	170	216	274	308	236	352
na8l	AQ	214	284	100	100	178	180	326	332	250	250	214	266	194	202	178	178	138	142	374	374	217	292
na9l831	AQ	214	284	100	122	178	180	370	370	214	250	214	266	224	252	180	180	324	324	336	364	328	370
na9l	AQ	214	284	98	98	178	180	370	370	250	250	-9999	-9999	194	202	174	174	136	142	368	368	214	370
ra1	AQ	214	284	100	100	178	180	300	394	214	250	214	320	194	202	174	174	-9999	-9999	300	370	214	394
ra2l	AQ	214	266	100	100	178	180	300	394	250	250	214	266	194	202	174	174	136	144	394	394	214	214
ra3l	AQ	214	262	100	100	178	180	300	394	250	250	214	250	-9999	-9999	-9999	-9999	138	142	300	394	370	394
rp1	AQ	214	284	100	100	178	180	296	370	250	250	214	266	238	238	-9999	-9999	138	142	260	260	214	394
rp2	AQ	214	284	100	128	180	180	274	312	214	214	214	266	194	194	-9999	-9999	138	142	296	394	214	308
rp3	AQ	214	284	98	98	178	180	274	394	214	214	214	266	200	200	-9999	-9999	150	150	296	394	394	370

## Sheet: HWE HW (2)
Outcomes of Tests for Hardy-Weinberg Equilibrium
Data Sheet	AQ_Rice D
Data Title	AQtemplate
No. Loci	11
No. Samples	57
No. Pops.	1
Pop	Pop1
Locus	zm30
Summary
Genotype	#Observed	#Expected
214214	0	14.25
214262	1	0.5
262262	0	0.00438596
214264	11	5.5
262264	0	0.0964912
264264	0	0.530702
214266	6	3
262266	0	0.0526316
264266	0	0.578947
266266	0	0.157895
214274	2	1
262274	0	0.0175439
264274	0	0.192982
266274	0	0.105263
274274	0	0.0175439
214284	33	16.5
262284	0	0.289474
264284	0	3.18421
266284	0	1.73684
274284	0	0.578947
284284	0	4.77632
214292	3	1.5
262292	0	0.0263158
264292	0	0.289474
266292	0	0.157895
274292	0	0.0526316
284292	0	0.868421
292292	0	0.0394737
214298	1	0.5
262298	0	0.00877193
264298	0	0.0964912
266298	0	0.0526316
274298	0	0.0175439
284298	0	0.289474
292298	0	0.0263158
298298	0	0.00438596
ChiSquare	57
DF	28
Prob	0.000969875	***
Pop	Pop1
Locus	zt18
Summary
Genotype	#Observed	#Expected
9898	3	0.654545
98100	6	10.4727
100100	44	41.8909
98122	0	0.109091
100122	1	0.872727
122122	0	0.00454545
98128	0	0.109091
100128	1	0.872727
122128	0	0.00909091
128128	0	0.00454545
ChiSquare	10.6944
DF	6
Prob	0.0982917	ns
Pop	Pop1
Locus	zm26
Summary
Genotype	#Observed	#Expected
178178	0	13.5045
178180	55	27.9911
180180	1	14.5045
ChiSquare	52.1391
DF	1
Prob	5.17045e-13	***
Pop	Pop1
Locus	zt1
Summary
Genotype	#Observed	#Expected
258258	0	0.00454545
258264	0	0.0272727
264264	0	0.0409091
258266	0	0.0363636
264266	0	0.109091
266266	1	0.0727273
258270	0	0.109091
264270	0	0.327273
266270	0	0.436364
270270	6	0.654545
258274	0	0.0727273
264274	0	0.218182
266274	0	0.290909
270274	0	0.872727
274274	1	0.290909
258296	0	0.0363636
264296	0	0.109091
266296	0	0.145455
270296	0	0.436364
274296	0	0.290909
296296	0	0.0727273
258298	0	0.00909091
264298	0	0.0272727
266298	0	0.0363636
270298	0	0.109091
274298	0	0.0727273
296298	0	0.0363636
298298	0	0.00454545
258300	0	0.172727
264300	2	0.518182
266300	1	0.690909
270300	0	2.07273
274300	1	1.38182
296300	0	0.690909
298300	0	0.172727
300300	0	1.64091
258302	0	0.00909091
264302	0	0.0272727
266302	0	0.0363636
270302	0	0.109091
274302	0	0.0727273
296302	0	0.0363636
298302	0	0.00909091
300302	0	0.172727
302302	0	0.00454545
258308	0	0.00909091
264308	0	0.0272727
266308	0	0.0363636
270308	0	0.109091
274308	1	0.0727273
296308	0	0.0363636
298308	0	0.00909091
300308	0	0.172727
302308	0	0.00909091
308308	0	0.00454545
258310	1	0.00909091
264310	0	0.0272727
266310	0	0.0363636
270310	0	0.109091
274310	0	0.0727273
296310	0	0.0363636
298310	0	0.00909091
300310	0	0.172727
302310	0	0.00909091
308310	0	0.00909091
310310	0	0.00454545
258312	0	0.00909091
264312	0	0.0272727
266312	0	0.0363636
270312	0	0.109091
274312	1	0.0727273
296312	0	0.0363636
298312	0	0.00909091
300312	0	0.172727
302312	0	0.00909091
308312	0	0.00909091
310312	0	0.00909091
312312	0	0.00454545
258326	0	0.00909091
264326	0	0.0272727
266326	0	0.0363636
270326	0	0.109091
274326	0	0.0727273
296326	0	0.0363636
298326	0	0.00909091
300326	0	0.172727
302326	0	0.00909091
308326	0	0.00909091
310326	0	0.00909091
312326	0	0.00909091
326326	0	0.00454545
258328	0	0.00909091
264328	0	0.0272727
266328	0	0.0363636
270328	0	0.109091
274328	0	0.0727273
296328	0	0.0363636
298328	0	0.00909091
300328	0	0.172727
302328	0	0.00909091
308328	0	0.00909091
310328	0	0.00909091
312328	0	0.00909091
326328	0	0.00909091
328328	0	0.00454545
258332	0	0.00909091
264332	0	0.0272727
266332	0	0.0363636
270332	0	0.109091
274332	0	0.0727273
296332	0	0.0363636
298332	0	0.00909091
300332	0	0.172727
302332	0	0.00909091
308332	0	0.00909091
310332	0	0.00909091
312332	0	0.00909091
326332	1	0.00909091
328332	0	0.00909091
332332	0	0.00454545
258346	0	0.00909091
264346	0	0.0272727
266346	0	0.0363636
270346	0	0.109091
274346	0	0.0727273
296346	0	0.0363636
298346	0	0.00909091
300346	0	0.172727
302346	0	0.00909091
308346	0	0.00909091
310346	0	0.00909091
312346	0	0.00909091
326346	0	0.00909091
328346	0	0.00909091
332346	0	0.00909091
346346	0	0.00454545
258352	0	0.00909091
264352	0	0.0272727
266352	0	0.0363636
270352	0	0.109091
274352	1	0.0727273
296352	0	0.0363636
298352	0	0.00909091
300352	0	0.172727
302352	0	0.00909091
308352	0	0.00909091
310352	0	0.00909091
312352	0	0.00909091
326352	0	0.00909091
328352	0	0.00909091
332352	0	0.00909091
346352	0	0.00909091
352352	0	0.00454545
258370	0	0.1
264370	1	0.3
266370	0	0.4
270370	0	1.2
274370	1	0.8
296370	1	0.4
298370	0	0.1
300370	0	1.9
302370	0	0.1
308370	0	0.1
310370	0	0.1
312370	0	0.1
326370	0	0.1
328370	1	0.1
332370	0	0.1
346370	1	0.1
352370	0	0.1
370370	2	0.55
258374	0	0.0181818
264374	0	0.0545455
266374	0	0.0727273
270374	0	0.218182
274374	0	0.145455
296374	0	0.0727273
298374	0	0.0181818
300374	0	0.345455
302374	0	0.0181818
308374	0	0.0181818
310374	0	0.0181818
312374	0	0.0181818
326374	0	0.0181818
328374	0	0.0181818
332374	0	0.0181818
346374	0	0.0181818
352374	0	0.0181818
370374	0	0.2
374374	1	0.0181818
258376	0	0.0909091
264376	0	0.272727
266376	0	0.363636
270376	0	1.09091
274376	0	0.727273
296376	1	0.363636
298376	0	0.0909091
300376	0	1.72727
302376	1	0.0909091
308376	0	0.0909091
310376	0	0.0909091
312376	0	0.0909091
326376	0	0.0909091
328376	0	0.0909091
332376	0	0.0909091
346376	0	0.0909091
352376	0	0.0909091
370376	1	1
374376	0	0.181818
376376	3	0.454545
258380	0	0.0272727
264380	0	0.0818182
266380	0	0.109091
270380	0	0.327273
274380	0	0.218182
296380	0	0.109091
298380	1	0.0272727
300380	1	0.518182
302380	0	0.0272727
308380	0	0.0272727
310380	0	0.0272727
312380	0	0.0272727
326380	0	0.0272727
328380	0	0.0272727
332380	0	0.0272727
346380	0	0.0272727
352380	0	0.0272727
370380	0	0.3
374380	0	0.0545455
376380	0	0.272727
380380	0	0.0409091
258388	0	0.0181818
264388	0	0.0545455
266388	0	0.0727273
270388	0	0.218182
274388	0	0.145455
296388	0	0.0727273
298388	0	0.0181818
300388	0	0.345455
302388	0	0.0181818
308388	0	0.0181818
310388	0	0.0181818
312388	0	0.0181818
326388	0	0.0181818
328388	0	0.0181818
332388	0	0.0181818
346388	0	0.0181818
352388	0	0.0181818
370388	0	0.2
374388	0	0.0363636
376388	0	0.181818
380388	0	0.0545455
388388	1	0.0181818
258390	0	0.00909091
264390	0	0.0272727
266390	0	0.0363636
270390	0	0.109091
274390	0	0.0727273
296390	0	0.0363636
298390	0	0.00909091
300390	1	0.172727
302390	0	0.00909091
308390	0	0.00909091
310390	0	0.00909091
312390	0	0.00909091
326390	0	0.00909091
328390	0	0.00909091
332390	0	0.00909091
346390	0	0.00909091
352390	0	0.00909091
370390	0	0.1
374390	0	0.0181818
376390	0	0.0909091
380390	0	0.0272727
388390	0	0.0181818
390390	0	0.00454545
258394	0	0.181818
264394	0	0.545455
266394	1	0.727273
270394	0	2.18182
274394	1	1.45455
296394	2	0.727273
298394	0	0.181818
300394	13	3.45455
302394	0	0.181818
308394	0	0.181818
310394	0	0.181818
312394	0	0.181818
326394	0	0.181818
328394	0	0.181818
332394	0	0.181818
346394	0	0.181818
352394	0	0.181818
370394	1	2
374394	0	0.363636
376394	1	1.81818
380394	1	0.545455
388394	0	0.363636
390394	0	0.181818
394394	0	1.81818
ChiSquare	570.987
DF	276
Prob	1.02243e-22	***
Pop	Pop1
Locus	zm44
Summary
Genotype	#Observed	#Expected
208208	0	0.00446429
208214	0	0.142857
214214	2	1.14286
208250	1	0.848214
214250	12	13.5714
250250	41	40.2902
ChiSquare	1.0118
DF	3
Prob	0.798397	ns
Pop	Pop1
Locus	zm36
Summary
Genotype	#Observed	#Expected
214214	2	13
214216	0	0.5
216216	0	0.00480769
214224	1	0.5
216224	0	0.00961538
224224	0	0.00480769
214232	1	0.5
216232	0	0.00961538
224232	0	0.00961538
232232	0	0.00480769
214250	1	0.5
216250	0	0.00961538
224250	0	0.00961538
232250	0	0.00961538
250250	0	0.00480769
214266	32	16.5
216266	1	0.317308
224266	0	0.317308
232266	0	0.317308
250266	0	0.317308
266266	0	5.23558
214274	2	1
216274	0	0.0192308
224274	0	0.0192308
232274	0	0.0192308
250274	0	0.0192308
266274	0	0.634615
274274	0	0.0192308
214278	1	0.5
216278	0	0.00961538
224278	0	0.00961538
232278	0	0.00961538
250278	0	0.00961538
266278	0	0.317308
274278	0	0.0192308
278278	0	0.00480769
214298	1	0.5
216298	0	0.00961538
224298	0	0.00961538
232298	0	0.00961538
250298	0	0.00961538
266298	0	0.317308
274298	0	0.0192308
278298	0	0.00961538
298298	0	0.00480769
214300	0	0.5
216300	0	0.00961538
224300	0	0.00961538
232300	0	0.00961538
250300	0	0.00961538
266300	0	0.317308
274300	0	0.0192308
278300	0	0.00961538
298300	0	0.00961538
300300	0	0.00480769
214320	1	0.5
216320	0	0.00961538
224320	0	0.00961538
232320	0	0.00961538
250320	0	0.00961538
266320	0	0.317308
274320	0	0.0192308
278320	0	0.00961538
298320	0	0.00961538
300320	0	0.00961538
320320	0	0.00480769
214326	1	0.5
216326	0	0.00961538
224326	0	0.00961538
232326	0	0.00961538
250326	0	0.00961538
266326	0	0.317308
274326	0	0.0192308
278326	0	0.00961538
298326	0	0.00961538
300326	0	0.00961538
320326	0	0.00961538
326326	0	0.00480769
214370	3	1.5
216370	0	0.0288462
224370	0	0.0288462
232370	0	0.0288462
250370	0	0.0288462
266370	0	0.951923
274370	0	0.0576923
278370	0	0.0288462
298370	0	0.0288462
300370	0	0.0288462
320370	0	0.0288462
326370	0	0.0288462
370370	0	0.0432692
214374	2	1
216374	0	0.0192308
224374	0	0.0192308
232374	0	0.0192308
250374	0	0.0192308
266374	0	0.634615
274374	0	0.0384615
278374	0	0.0192308
298374	0	0.0192308
300374	0	0.0192308
320374	0	0.0192308
326374	0	0.0192308
370374	0	0.0576923
374374	0	0.0192308
214394	2	1
216394	0	0.0192308
224394	0	0.0192308
232394	0	0.0192308
250394	0	0.0192308
266394	0	0.634615
274394	0	0.0384615
278394	0	0.0192308
298394	0	0.0192308
300394	0	0.0192308
320394	0	0.0192308
326394	0	0.0192308
370394	0	0.0576923
374394	0	0.0384615
394394	0	0.0192308
214396	0	0.5
216396	0	0.00961538
224396	0	0.00961538
232396	0	0.00961538
250396	0	0.00961538
266396	0	0.317308
274396	0	0.0192308
278396	0	0.00961538
298396	0	0.00961538
300396	1	0.00961538
320396	0	0.00961538
326396	0	0.00961538
370396	0	0.0288462
374396	0	0.0192308
394396	0	0.0192308
396396	0	0.00480769
ChiSquare	149.52
DF	120
Prob	0.0350965	*
Pop	Pop1
Locus	Zt22
Summary
Genotype	#Observed	#Expected
170170	0	0.00462963
170178	0	0.00925926
178178	0	0.00462963
170194	0	0.212963
178194	0	0.212963
194194	1	2.44907
170196	0	0.00925926
178196	0	0.00925926
194196	0	0.212963
196196	0	0.00462963
170200	0	0.0277778
178200	0	0.0277778
194200	0	0.638889
196200	0	0.0277778
200200	1	0.0416667
170202	0	0.203704
178202	0	0.203704
194202	21	4.68519
196202	0	0.203704
200202	0	0.611111
202202	0	2.24074
170210	0	0.0185185
178210	0	0.0185185
194210	0	0.425926
196210	0	0.0185185
200210	1	0.0555556
202210	0	0.407407
210210	0	0.0185185
170212	0	0.00925926
178212	0	0.00925926
194212	0	0.212963
196212	0	0.00925926
200212	0	0.0277778
202212	1	0.203704
210212	0	0.0185185
212212	0	0.00462963
170216	0	0.037037
178216	0	0.037037
194216	0	0.851852
196216	0	0.037037
200216	0	0.111111
202216	0	0.814815
210216	0	0.0740741
212216	0	0.037037
216216	1	0.0740741
170218	0	0.00925926
178218	0	0.00925926
194218	0	0.212963
196218	0	0.00925926
200218	0	0.0277778
202218	0	0.203704
210218	0	0.0185185
212218	0	0.00925926
216218	0	0.037037
218218	0	0.00462963
170220	0	0.0462963
178220	0	0.0462963
194220	0	1.06481
196220	0	0.0462963
200220	0	0.138889
202220	0	1.01852
210220	0	0.0925926
212220	0	0.0462963
216220	0	0.185185
218220	0	0.0462963
220220	2	0.115741
170222	0	0.037037
178222	0	0.037037
194222	0	0.851852
196222	0	0.037037
200222	0	0.111111
202222	0	0.814815
210222	0	0.0740741
212222	0	0.037037
216222	0	0.148148
218222	0	0.037037
220222	0	0.185185
222222	2	0.0740741
170224	0	0.0277778
178224	0	0.0277778
194224	0	0.638889
196224	0	0.0277778
200224	0	0.0833333
202224	0	0.611111
210224	0	0.0555556
212224	0	0.0277778
216224	0	0.111111
218224	0	0.0277778
220224	0	0.138889
222224	0	0.111111
224224	1	0.0416667
170226	0	0.0555556
178226	0	0.0555556
194226	0	1.27778
196226	0	0.0555556
200226	0	0.166667
202226	0	1.22222
210226	0	0.111111
212226	0	0.0555556
216226	1	0.222222
218226	0	0.0555556
220226	0	0.277778
222226	0	0.222222
224226	0	0.166667
226226	1	0.166667
170230	0	0.0277778
178230	0	0.0277778
194230	0	0.638889
196230	0	0.0277778
200230	0	0.0833333
202230	0	0.611111
210230	1	0.0555556
212230	0	0.0277778
216230	0	0.111111
218230	0	0.0277778
220230	0	0.138889
222230	0	0.111111
224230	0	0.0833333
226230	0	0.166667
230230	1	0.0416667
170236	0	0.037037
178236	0	0.037037
194236	0	0.851852
196236	0	0.037037
200236	0	0.111111
202236	0	0.814815
210236	0	0.0740741
212236	0	0.037037
216236	0	0.148148
218236	0	0.037037
220236	0	0.185185
222236	0	0.148148
224236	0	0.111111
226236	0	0.222222
230236	0	0.111111
236236	1	0.0740741
170238	0	0.0462963
178238	0	0.0462963
194238	0	1.06481
196238	0	0.0462963
200238	0	0.138889
202238	0	1.01852
210238	0	0.0925926
212238	0	0.0462963
216238	0	0.185185
218238	0	0.0462963
220238	1	0.231481
222238	0	0.185185
224238	0	0.138889
226238	0	0.277778
230238	0	0.138889
236238	0	0.185185
238238	2	0.115741
170246	0	0.0185185
178246	1	0.0185185
194246	0	0.425926
196246	0	0.0185185
200246	0	0.0555556
202246	0	0.407407
210246	0	0.037037
212246	0	0.0185185
216246	1	0.0740741
218246	0	0.0185185
220246	0	0.0925926
222246	0	0.0740741
224246	0	0.0555556
226246	0	0.111111
230246	0	0.0555556
236246	0	0.0740741
238246	0	0.0925926
246246	0	0.0185185
170248	0	0.00925926
178248	0	0.00925926
194248	0	0.212963
196248	0	0.00925926
200248	0	0.0277778
202248	0	0.203704
210248	0	0.0185185
212248	0	0.00925926
216248	0	0.037037
218248	0	0.00925926
220248	0	0.0462963
222248	0	0.037037
224248	0	0.0277778
226248	0	0.0555556
230248	0	0.0277778
236248	0	0.037037
238248	0	0.0462963
246248	0	0.0185185
248248	0	0.00462963
170252	1	0.037037
178252	0	0.037037
194252	0	0.851852
196252	0	0.037037
200252	0	0.111111
202252	0	0.814815
210252	0	0.0740741
212252	0	0.037037
216252	0	0.148148
218252	1	0.037037
220252	0	0.185185
222252	0	0.148148
224252	1	0.111111
226252	1	0.222222
230252	0	0.111111
236252	0	0.148148
238252	0	0.185185
246252	0	0.0740741
248252	0	0.037037
252252	0	0.0740741
170254	0	0.0185185
178254	0	0.0185185
194254	0	0.425926
196254	0	0.0185185
200254	0	0.0555556
202254	0	0.407407
210254	0	0.037037
212254	0	0.0185185
216254	0	0.0740741
218254	0	0.0185185
220254	0	0.0925926
222254	0	0.0740741
224254	0	0.0555556
226254	0	0.111111
230254	0	0.0555556
236254	0	0.0740741
238254	0	0.0925926
246254	0	0.037037
248254	0	0.0185185
252254	0	0.0740741
254254	1	0.0185185
170256	0	0.0555556
178256	0	0.0555556
194256	0	1.27778
196256	1	0.0555556
200256	0	0.166667
202256	0	1.22222
210256	0	0.111111
212256	0	0.0555556
216256	0	0.222222
218256	0	0.0555556
220256	0	0.277778
222256	0	0.222222
224256	0	0.166667
226256	0	0.333333
230256	0	0.166667
236256	1	0.222222
238256	0	0.277778
246256	0	0.111111
248256	0	0.0555556
252256	0	0.222222
254256	0	0.111111
256256	2	0.166667
170260	0	0.0185185
178260	0	0.0185185
194260	0	0.425926
196260	0	0.0185185
200260	0	0.0555556
202260	0	0.407407
210260	0	0.037037
212260	0	0.0185185
216260	0	0.0740741
218260	0	0.0185185
220260	0	0.0925926
222260	0	0.0740741
224260	0	0.0555556
226260	1	0.111111
230260	0	0.0555556
236260	1	0.0740741
238260	0	0.0925926
246260	0	0.037037
248260	0	0.0185185
252260	0	0.0740741
254260	0	0.037037
256260	0	0.111111
260260	0	0.0185185
170268	0	0.00925926
178268	0	0.00925926
194268	0	0.212963
196268	0	0.00925926
200268	0	0.0277778
202268	0	0.203704
210268	0	0.0185185
212268	0	0.00925926
216268	0	0.037037
218268	0	0.00925926
220268	0	0.0462963
222268	0	0.037037
224268	0	0.0277778
226268	1	0.0555556
230268	0	0.0277778
236268	0	0.037037
238268	0	0.0462963
246268	0	0.0185185
248268	0	0.00925926
252268	0	0.037037
254268	0	0.0185185
256268	0	0.0555556
260268	0	0.0185185
268268	0	0.00462963
170270	0	0.00925926
178270	0	0.00925926
194270	0	0.212963
196270	0	0.00925926
200270	0	0.0277778
202270	0	0.203704
210270	0	0.0185185
212270	0	0.00925926
216270	0	0.037037
218270	0	0.00925926
220270	0	0.0462963
222270	0	0.037037
224270	0	0.0277778
226270	0	0.0555556
230270	0	0.0277778
236270	0	0.037037
238270	0	0.0462963
246270	0	0.0185185
248270	1	0.00925926
252270	0	0.037037
254270	0	0.0185185
256270	0	0.0555556
260270	0	0.0185185
268270	0	0.00925926
270270	0	0.00462963
ChiSquare	702.384
DF	300
Prob	2.64751e-34	***
Pop	Pop1
Locus	ZT13
Summary
Genotype	#Observed	#Expected
174174	6	1.76961
174176	0	0.558824
176176	1	0.0441176
174178	0	7.07843
176178	1	1.11765
178178	15	7.07843
174180	1	4.47059
176180	0	0.705882
178180	0	8.94118
180180	11	2.82353
174182	6	1.86275
176182	0	0.294118
178182	2	3.72549
180182	0	2.35294
182182	1	0.490196
174184	0	1.4902
176184	0	0.235294
178184	5	2.98039
180184	1	1.88235
182184	0	0.784314
184184	1	0.313725
ChiSquare	102.316
DF	15
Prob	4.73989e-15	***
Pop	Pop1
Locus	ZM25
Summary
Genotype	#Observed	#Expected
130130	0	0.0196078
130136	0	0.0980392
136136	0	0.122549
130138	0	0.196078
136138	0	0.490196
138138	0	0.490196
130142	0	0.156863
136142	1	0.392157
138142	7	0.784314
142142	0	0.313725
130144	0	0.137255
136144	3	0.343137
138144	2	0.686275
142144	0	0.54902
144144	0	0.240196
130150	0	0.0588235
136150	0	0.147059
138150	0	0.294118
142150	0	0.235294
144150	0	0.205882
150150	1	0.0441176
130152	0	0.0196078
136152	0	0.0490196
138152	0	0.0980392
142152	0	0.0784314
144152	0	0.0686275
150152	0	0.0294118
152152	0	0.00490196
130156	0	0.0196078
136156	0	0.0490196
138156	0	0.0980392
142156	0	0.0784314
144156	0	0.0686275
150156	0	0.0294118
152156	0	0.00980392
156156	0	0.00490196
130170	1	0.823529
136170	1	2.05882
138170	1	4.11765
142170	0	3.29412
144170	2	2.88235
150170	1	1.23529
152170	1	0.411765
156170	1	0.411765
170170	12	8.64706
130172	0	0.0196078
136172	0	0.0490196
138172	0	0.0980392
142172	0	0.0784314
144172	0	0.0686275
150172	0	0.0294118
152172	0	0.00980392
156172	0	0.00980392
170172	0	0.411765
172172	0	0.00490196
130178	1	0.0196078
136178	0	0.0490196
138178	0	0.0980392
142178	0	0.0784314
144178	0	0.0686275
150178	0	0.0294118
152178	0	0.00980392
156178	0	0.00980392
170178	0	0.411765
172178	0	0.00980392
178178	0	0.00490196
130180	0	0.117647
136180	0	0.294118
138180	0	0.588235
142180	0	0.470588
144180	0	0.411765
150180	0	0.176471
152180	0	0.0588235
156180	0	0.0588235
170180	4	2.47059
172180	0	0.0588235
178180	0	0.0588235
180180	1	0.176471
130186	0	0.0196078
136186	0	0.0490196
138186	0	0.0980392
142186	0	0.0784314
144186	0	0.0686275
150186	0	0.0294118
152186	0	0.00980392
156186	0	0.00980392
170186	0	0.411765
172186	0	0.00980392
178186	0	0.00980392
180186	0	0.0588235
186186	0	0.00490196
130188	0	0.0196078
136188	0	0.0490196
138188	0	0.0980392
142188	0	0.0784314
144188	0	0.0686275
150188	0	0.0294118
152188	0	0.00980392
156188	0	0.00980392
170188	1	0.411765
172188	0	0.00980392
178188	0	0.00980392
180188	0	0.0588235
186188	0	0.00980392
188188	0	0.00490196
130216	0	0.0588235
136216	0	0.147059
138216	0	0.294118
142216	0	0.235294
144216	0	0.205882
150216	0	0.0882353
152216	0	0.0294118
156216	0	0.0294118
170216	2	1.23529
172216	1	0.0294118
178216	0	0.0294118
180216	0	0.176471
186216	0	0.0294118
188216	0	0.0294118
216216	0	0.0441176
130260	0	0.0196078
136260	0	0.0490196
138260	0	0.0980392
142260	0	0.0784314
144260	0	0.0686275
150260	0	0.0294118
152260	0	0.00980392
156260	0	0.00980392
170260	0	0.411765
172260	0	0.00980392
178260	0	0.00980392
180260	0	0.0588235
186260	1	0.00980392
188260	0	0.00980392
216260	0	0.0294118
260260	0	0.00490196
130268	0	0.117647
136268	0	0.294118
138268	0	0.588235
142268	0	0.470588
144268	0	0.411765
150268	0	0.176471
152268	0	0.0588235
156268	0	0.0588235
170268	3	2.47059
172268	0	0.0588235
178268	0	0.0588235
180268	0	0.352941
186268	0	0.0588235
188268	0	0.0588235
216268	0	0.176471
260268	0	0.0588235
268268	1	0.176471
130324	0	0.0588235
136324	0	0.147059
138324	0	0.294118
142324	0	0.235294
144324	0	0.205882
150324	0	0.0882353
152324	0	0.0294118
156324	0	0.0294118
170324	0	1.23529
172324	0	0.0294118
178324	0	0.0294118
180324	0	0.176471
186324	0	0.0294118
188324	0	0.0294118
216324	0	0.0882353
260324	0	0.0294118
268324	1	0.176471
324324	1	0.0441176
ChiSquare	336.852
DF	153
Prob	7.37544e-16	***
Pop	Pop1
Locus	zm40
Summary
Genotype	#Observed	#Expected
214214	0	0.0181818
214220	0	0.0363636
220220	1	0.0181818
214260	0	0.0363636
220260	0	0.0363636
260260	1	0.0181818
214266	1	0.0727273
220266	0	0.0727273
260266	0	0.0727273
266266	0	0.0727273
214274	0	0.0363636
220274	0	0.0363636
260274	0	0.0363636
266274	1	0.0727273
274274	0	0.0181818
214276	0	0.0181818
220276	0	0.0181818
260276	0	0.0181818
266276	0	0.0363636
274276	0	0.0181818
276276	0	0.00454545
214296	0	0.127273
220296	0	0.127273
260296	0	0.127273
266296	0	0.254545
274296	0	0.127273
276296	0	0.0636364
296296	0	0.222727
214298	0	0.0181818
220298	0	0.0181818
260298	0	0.0181818
266298	0	0.0363636
274298	0	0.0181818
276298	0	0.00909091
296298	0	0.0636364
298298	0	0.00454545
214300	1	0.527273
220300	0	0.527273
260300	0	0.527273
266300	0	1.05455
274300	0	0.527273
276300	0	0.263636
296300	0	1.84545
298300	0	0.263636
300300	1	3.82273
214308	0	0.0181818
220308	0	0.0181818
260308	0	0.0181818
266308	0	0.0363636
274308	1	0.0181818
276308	0	0.00909091
296308	0	0.0636364
298308	0	0.00909091
300308	0	0.263636
308308	0	0.00454545
214320	0	0.0363636
220320	0	0.0363636
260320	0	0.0363636
266320	0	0.0727273
274320	0	0.0363636
276320	0	0.0181818
296320	0	0.127273
298320	0	0.0181818
300320	0	0.527273
308320	0	0.0181818
320320	0	0.0181818
214336	0	0.0181818
220336	0	0.0181818
260336	0	0.0181818
266336	0	0.0363636
274336	0	0.0181818
276336	0	0.00909091
296336	0	0.0636364
298336	0	0.00909091
300336	0	0.263636
308336	0	0.00909091
320336	0	0.0181818
336336	0	0.00454545
214364	0	0.0181818
220364	0	0.0181818
260364	0	0.0181818
266364	0	0.0363636
274364	0	0.0181818
276364	0	0.00909091
296364	0	0.0636364
298364	0	0.00909091
300364	0	0.263636
308364	0	0.00909091
320364	0	0.0181818
336364	1	0.00909091
364364	0	0.00454545
214368	0	0.0727273
220368	0	0.0727273
260368	0	0.0727273
266368	0	0.145455
274368	0	0.0727273
276368	0	0.0363636
296368	0	0.254545
298368	0	0.0363636
300368	2	1.05455
308368	0	0.0363636
320368	0	0.0727273
336368	0	0.0363636
364368	0	0.0363636
368368	1	0.0727273
214370	0	0.0181818
220370	0	0.0181818
260370	0	0.0181818
266370	0	0.0363636
274370	0	0.0181818
276370	0	0.00909091
296370	0	0.0636364
298370	0	0.00909091
300370	1	0.263636
308370	0	0.00909091
320370	0	0.0181818
336370	0	0.00909091
364370	0	0.00909091
368370	0	0.0363636
370370	0	0.00454545
214374	0	0.418182
220374	0	0.418182
260374	0	0.418182
266374	0	0.836364
274374	0	0.418182
276374	1	0.209091
296374	3	1.46364
298374	1	0.209091
300374	4	6.06364
308374	0	0.209091
320374	2	0.418182
336374	0	0.209091
364374	0	0.209091
368374	0	0.836364
370374	0	0.209091
374374	6	2.40455
214376	0	0.0181818
220376	0	0.0181818
260376	0	0.0181818
266376	0	0.0363636
274376	0	0.0181818
276376	0	0.00909091
296376	1	0.0636364
298376	0	0.00909091
300376	0	0.263636
308376	0	0.00909091
320376	0	0.0181818
336376	0	0.00909091
364376	0	0.00909091
368376	0	0.0363636
370376	0	0.00909091
374376	0	0.209091
376376	0	0.00454545
214378	0	0.0181818
220378	0	0.0181818
260378	0	0.0181818
266378	0	0.0363636
274378	0	0.0181818
276378	0	0.00909091
296378	0	0.0636364
298378	0	0.00909091
300378	1	0.263636
308378	0	0.00909091
320378	0	0.0181818
336378	0	0.00909091
364378	0	0.00909091
368378	0	0.0363636
370378	0	0.00909091
374378	0	0.209091
376378	0	0.00909091
378378	0	0.00454545
214380	0	0.0545455
220380	0	0.0545455
260380	0	0.0545455
266380	0	0.109091
274380	0	0.0545455
276380	0	0.0272727
296380	1	0.190909
298380	0	0.0272727
300380	2	0.790909
308380	0	0.0272727
320380	0	0.0545455
336380	0	0.0272727
364380	0	0.0272727
368380	0	0.109091
370380	0	0.0272727
374380	0	0.627273
376380	0	0.0272727
378380	0	0.0272727
380380	0	0.0409091
214384	0	0.0181818
220384	0	0.0181818
260384	0	0.0181818
266384	0	0.0363636
274384	0	0.0181818
276384	0	0.00909091
296384	0	0.0636364
298384	0	0.00909091
300384	1	0.263636
308384	0	0.00909091
320384	0	0.0181818
336384	0	0.00909091
364384	0	0.00909091
368384	0	0.0363636
370384	0	0.00909091
374384	0	0.209091
376384	0	0.00909091
378384	0	0.00909091
380384	0	0.0272727
384384	0	0.00454545
214390	0	0.0181818
220390	0	0.0181818
260390	0	0.0181818
266390	1	0.0363636
274390	0	0.0181818
276390	0	0.00909091
296390	0	0.0636364
298390	0	0.00909091
300390	0	0.263636
308390	0	0.00909091
320390	0	0.0181818
336390	0	0.00909091
364390	0	0.00909091
368390	0	0.0363636
370390	0	0.00909091
374390	0	0.209091
376390	0	0.00909091
378390	0	0.00909091
380390	0	0.0272727
384390	0	0.00909091
390390	0	0.00454545
214394	0	0.363636
220394	0	0.363636
260394	0	0.363636
266394	1	0.727273
274394	0	0.363636
276394	0	0.181818
296394	2	1.27273
298394	0	0.181818
300394	15	5.27273
308394	0	0.181818
320394	0	0.363636
336394	0	0.181818
364394	0	0.181818
368394	0	0.727273
370394	0	0.181818
374394	0	4.18182
376394	0	0.181818
378394	0	0.181818
380394	0	0.545455
384394	0	0.181818
390394	0	0.181818
394394	1	1.81818
ChiSquare	422.721
DF	231
Prob	2.09453e-13	***
Pop	Pop1
Locus	zm35
Summary
Genotype	#Observed	#Expected
206206	0	0.00446429
206214	0	0.178571
214214	2	1.78571
206217	0	0.00892857
214217	0	0.178571
217217	0	0.00446429
206218	1	0.0446429
214218	0	0.892857
217218	0	0.0446429
218218	1	0.111607
206236	0	0.0803571
214236	0	1.60714
217236	0	0.0803571
218236	1	0.401786
236236	2	0.361607
206266	0	0.00892857
214266	0	0.178571
217266	0	0.00892857
218266	0	0.0446429
236266	0	0.0803571
266266	0	0.00446429
206270	0	0.0267857
214270	1	0.535714
217270	0	0.0267857
218270	0	0.133929
236270	0	0.241071
266270	0	0.0267857
270270	1	0.0401786
206290	0	0.00892857
214290	0	0.178571
217290	0	0.00892857
218290	0	0.0446429
236290	0	0.0803571
266290	0	0.00892857
270290	0	0.0267857
290290	0	0.00446429
206292	0	0.00892857
214292	0	0.178571
217292	1	0.00892857
218292	0	0.0446429
236292	0	0.0803571
266292	0	0.00892857
270292	0	0.0267857
290292	0	0.00892857
292292	0	0.00446429
206294	0	0.00892857
214294	0	0.178571
217294	0	0.00892857
218294	0	0.0446429
236294	0	0.0803571
266294	1	0.00892857
270294	0	0.0267857
290294	0	0.00892857
292294	0	0.00892857
294294	0	0.00446429
206300	0	0.125
214300	0	2.5
217300	0	0.125
218300	0	0.625
236300	0	1.125
266300	0	0.125
270300	0	0.375
290300	0	0.125
292300	0	0.125
294300	0	0.125
300300	2	0.875
206308	0	0.00892857
214308	1	0.178571
217308	0	0.00892857
218308	0	0.0446429
236308	0	0.0803571
266308	0	0.00892857
270308	0	0.0267857
290308	0	0.00892857
292308	0	0.00892857
294308	0	0.00892857
300308	0	0.125
308308	0	0.00446429
206312	0	0.0178571
214312	1	0.357143
217312	0	0.0178571
218312	0	0.0892857
236312	0	0.160714
266312	0	0.0178571
270312	0	0.0535714
290312	0	0.0178571
292312	0	0.0178571
294312	0	0.0178571
300312	0	0.25
308312	0	0.0178571
312312	0	0.0178571
206314	0	0.00892857
214314	0	0.178571
217314	0	0.00892857
218314	0	0.0446429
236314	0	0.0803571
266314	0	0.00892857
270314	0	0.0267857
290314	0	0.00892857
292314	0	0.00892857
294314	0	0.00892857
300314	0	0.125
308314	0	0.00892857
312314	0	0.0178571
314314	0	0.00446429
206328	0	0.00892857
214328	0	0.178571
217328	0	0.00892857
218328	0	0.0446429
236328	0	0.0803571
266328	0	0.00892857
270328	0	0.0267857
290328	0	0.00892857
292328	0	0.00892857
294328	0	0.00892857
300328	0	0.125
308328	0	0.00892857
312328	0	0.0178571
314328	0	0.00892857
328328	0	0.00446429
206351	0	0.00892857
214351	0	0.178571
217351	0	0.00892857
218351	0	0.0446429
236351	0	0.0803571
266351	0	0.00892857
270351	0	0.0267857
290351	0	0.00892857
292351	0	0.00892857
294351	0	0.00892857
300351	0	0.125
308351	0	0.00892857
312351	0	0.0178571
314351	0	0.00892857
328351	0	0.00892857
351351	0	0.00446429
206352	0	0.00892857
214352	0	0.178571
217352	0	0.00892857
218352	0	0.0446429
236352	1	0.0803571
266352	0	0.00892857
270352	0	0.0267857
290352	0	0.00892857
292352	0	0.00892857
294352	0	0.00892857
300352	0	0.125
308352	0	0.00892857
312352	0	0.0178571
314352	0	0.00892857
328352	0	0.00892857
351352	0	0.00892857
352352	0	0.00446429
206370	0	0.125
214370	6	2.5
217370	0	0.125
218370	0	0.625
236370	0	1.125
266370	0	0.125
270370	0	0.375
290370	0	0.125
292370	0	0.125
294370	0	0.125
300370	3	1.75
308370	0	0.125
312370	1	0.25
314370	0	0.125
328370	1	0.125
351370	0	0.125
352370	0	0.125
370370	0	0.875
206374	0	0.125
214374	3	2.5
217374	0	0.125
218374	1	0.625
236374	2	1.125
266374	0	0.125
270374	0	0.375
290374	1	0.125
292374	0	0.125
294374	0	0.125
300374	1	1.75
308374	0	0.125
312374	0	0.25
314374	1	0.125
328374	0	0.125
351374	1	0.125
352374	0	0.125
370374	1	1.75
374374	0	0.875
206380	0	0.00892857
214380	0	0.178571
217380	0	0.00892857
218380	0	0.0446429
236380	0	0.0803571
266380	0	0.00892857
270380	0	0.0267857
290380	0	0.00892857
292380	0	0.00892857
294380	0	0.00892857
300380	1	0.125
308380	0	0.00892857
312380	0	0.0178571
314380	0	0.00892857
328380	0	0.00892857
351380	0	0.00892857
352380	0	0.00892857
370380	0	0.125
374380	0	0.125
380380	0	0.00446429
206388	0	0.00892857
214388	0	0.178571
217388	0	0.00892857
218388	0	0.0446429
236388	0	0.0803571
266388	0	0.00892857
270388	0	0.0267857
290388	0	0.00892857
292388	0	0.00892857
294388	0	0.00892857
300388	0	0.125
308388	0	0.00892857
312388	0	0.0178571
314388	0	0.00892857
328388	0	0.00892857
351388	0	0.00892857
352388	0	0.00892857
370388	0	0.125
374388	0	0.125
380388	0	0.00892857
388388	0	0.00446429
206394	0	0.160714
214394	4	3.21429
217394	0	0.160714
218394	0	0.803571
236394	1	1.44643
266394	0	0.160714
270394	0	0.482143
290394	0	0.160714
292394	0	0.160714
294394	0	0.160714
300394	5	2.25
308394	0	0.160714
312394	0	0.321429
314394	0	0.160714
328394	0	0.160714
351394	0	0.160714
352394	0	0.160714
370394	2	2.25
374394	3	2.25
380394	0	0.160714
388394	1	0.160714
394394	1	1.44643
ChiSquare	370.235
DF	231
Prob	1.58936e-08	***
Summary by locus for Pop1
Locus	ChiSquare	DF	Prob
zm30	57	28	0.000969875	***
zt18	10.6944	6	0.0982917	ns
zm26	52.1391	1	5.17045e-13	***
zt1	570.987	276	1.02243e-22	***
zm44	1.0118	3	0.798397	ns
zm36	149.52	120	0.0350965	*
Zt22	702.384	300	2.64751e-34	***
ZT13	102.316	15	4.73989e-15	***
ZM25	336.852	153	7.37544e-16	***
zm40	422.721	231	2.09453e-13	***
zm35	370.235	231	1.58936e-08	***
Key: ns=not significant, * P<0.05, ** P<0.01, *** P<0.001
Warning! Results should be treated with caution given some samples sizes < 50 (see Hedrick 2000).
Warning! Results should be treated with caution given that expected numbers are < 5 in some classes (see Hedrick 2000).

## Sheet: HWE HWS (2)
Summary of Chi-Square Tests for Hardy-Weinberg Equilibrium
Data Sheet	AQ_Rice D
Data Title	AQtemplate
No. Loci	11
No. Samples	57
No. Pops.	1
Pop	Locus	DF	ChiSq	Prob	Signif
Pop1	zm30	28	57	0.000969875	***
Pop1	zt18	6	10.6944	0.0982917	ns
Pop1	zm26	1	52.1391	5.17045e-13	***
Pop1	zt1	276	570.987	1.02243e-22	***
Pop1	zm44	3	1.0118	0.798397	ns
Pop1	zm36	120	149.52	0.0350965	*
Pop1	Zt22	300	702.384	2.64751e-34	***
Pop1	ZT13	15	102.316	4.73989e-15	***
Pop1	ZM25	153	336.852	7.37544e-16	***
Pop1	zm40	231	422.721	2.09453e-13	***
Pop1	zm35	231	370.235	1.58936e-08	***
Key: ns=not significant, * P<0.05, ** P<0.01, *** P<0.001

## Sheet: HWE PI (2)
Probability of Identity (PI) for each Locus and for Increasing Combinations of the 11 Loci
Data Sheet	AQ_Rice D
Data Title	AQtemplate
No. Loci	11
No. Samples	57
No. Pops.	1
PI for Increasing Locus Combinations
Pop	N	1	1+2	1+2+3	1+2+3+4	1+2+3+4+5	1+2+3+4+5+6	1+2+3+4+5+6+7	1+2+3+4+5+6+7+8	1+2+3+4+5+6+7+8+9	1+2+3+4+5+6+7+8+9+10	1+2+3+4+5+6+7+8+9+10+11
Pop1	57	0.171243	0.105661	0.0396314	0.000767315	0.000442755	7.85257e-05	1.50399e-06	1.45676e-07	7.79152e-09	3.18983e-10	7.66838e-12
PIsibs for Increasing Locus Combinations
Pop	N	1	1+2	1+2+3	1+2+3+4	1+2+3+4+5	1+2+3+4+5+6	1+2+3+4+5+6+7	1+2+3+4+5+6+7+8	1+2+3+4+5+6+7+8+9	1+2+3+4+5+6+7+8+9+10	1+2+3+4+5+6+7+8+9+10+11
Pop1	57	0.466326	0.368918	0.219082	0.0672376	0.0513851	0.0242083	0.00746515	0.00296334	0.00108123	0.000365819	0.000114709
PI by Locus
Pop	N	zm30	zt18	zm26	zt1	zm44	zm36	Zt22	ZT13	ZM25	zm40	zm35
Pop1	57	0.171243	0.617025	0.37508	0.0193613	0.577018	0.177357	0.0191528	0.0968599	0.0534852	0.0409398	0.0240401
PISibs by Locus
Pop	N	zm30	zt18	zm26	zt1	zm44	zm36	Zt22	ZT13	ZM25	zm40	zm35
Pop1	57	0.466326	0.791116	0.59385	0.306906	0.764232	0.471114	0.308372	0.396956	0.364871	0.338334	0.313567
Estimated Expected No. Individuals (calculated as respective probability x population size)
Expected No. Individuals with the Same Multilocus Genotype for Increasing Locus Combinations
Pop	N	1	1+2	1+2+3	1+2+3+4	1+2+3+4+5	1+2+3+4+5+6	1+2+3+4+5+6+7	1+2+3+4+5+6+7+8	1+2+3+4+5+6+7+8+9	1+2+3+4+5+6+7+8+9+10	1+2+3+4+5+6+7+8+9+10+11
Pop1	57	9.76084	6.02269	2.25899	0.043737	0.025237	0.00447596	8.57274e-05	8.30354e-06	4.44117e-07	1.8182e-08	4.37098e-10
Expected No. Individuals with the Same Multilocus Genotype for Increasing Locus Combinations Based on PIsibs
Pop	N	1	1+2	1+2+3	1+2+3+4	1+2+3+4+5	1+2+3+4+5+6	1+2+3+4+5+6+7	1+2+3+4+5+6+7+8	1+2+3+4+5+6+7+8+9	1+2+3+4+5+6+7+8+9+10	1+2+3+4+5+6+7+8+9+10+11
Pop1	57	26.5806	21.0283	12.4877	3.83254	2.92895	1.37987	0.425513	0.16891	0.0616304	0.0208517	0.0065384
Expected No. Individuals with the Same Genotype at a Given Locus
Pop	N	zm30	zt18	zm26	zt1	zm44	zm36	Zt22	ZT13	ZM25	zm40	zm35
Pop1	57	9.76084	35.1704	21.3795	1.10359	32.89	10.1094	1.09171	5.52101	3.04866	2.33357	1.37028
Expected No. Individuals with the Same Genotype at a Given Locus Based on PIsibs
Pop	N	zm30	zt18	zm26	zt1	zm44	zm36	Zt22	ZT13	ZM25	zm40	zm35
Pop1	57	26.5806	45.0936	33.8494	17.4937	43.5612	26.8535	17.5772	22.6265	20.7976	19.285	17.8733
PI = Probability of Identity at a Locus = 2*[Sum (pi^2)^2]-Sum(pi)^4
Where pi is the frequency of the i-th allele at a locus.
PI over multiple loci is calculated as the product of the individual locus PI's.
PISibs = Probability of Identity for Sibs at a Locus = 0.25 + [0.5 * Sum(pi^2) ]+ [0.5 * Sum(pi^2)^ 2] - [0.25 * Sum(pi)^4]
PISibs over multiple loci is calculated as the product of the individual locus PIsibs.

## Sheet: AFP
Allele Frequencies by Population for Codominant Data
Data Sheet	AQ_Rice D
Data Title	AQtemplate
No. Loci	11
No. Samples	57
No. Pops.	1
Allele Frequencies and Sample Size by Populations
Locus	Allele/n	Pop1
zm30	N	57
	214	0.5
	262	0.00877
	264	0.09649
	266	0.05263
	274	0.01754
	284	0.28947
	292	0.02632
	298	0.00877
zt18	N	55
	98	0.10909
	100	0.87273
	122	0.00909
	128	0.00909
zm26	N	56
	178	0.49107
	180	0.50893
zt1	N	55
	258	0.00909
	264	0.02727
	266	0.03636
	270	0.10909
	274	0.07273
	296	0.03636
	298	0.00909
	300	0.17273
	302	0.00909
	308	0.00909
	310	0.00909
	312	0.00909
	326	0.00909
	328	0.00909
	332	0.00909
	346	0.00909
	352	0.00909
	370	0.1
	374	0.01818
	376	0.09091
	380	0.02727
	388	0.01818
	390	0.00909
	394	0.18182
zm44	N	56
	208	0.00893
	214	0.14286
	250	0.84821
zm36	N	52
	214	0.5
	216	0.00962
	224	0.00962
	232	0.00962
	250	0.00962
	266	0.31731
	274	0.01923
	278	0.00962
	298	0.00962
	300	0.00962
	320	0.00962
	326	0.00962
	370	0.02885
	374	0.01923
	394	0.01923
	396	0.00962
Zt22	N	54
	170	0.00926
	178	0.00926
	194	0.21296
	196	0.00926
	200	0.02778
	202	0.2037
	210	0.01852
	212	0.00926
	216	0.03704
	218	0.00926
	220	0.0463
	222	0.03704
	224	0.02778
	226	0.05556
	230	0.02778
	236	0.03704
	238	0.0463
	246	0.01852
	248	0.00926
	252	0.03704
	254	0.01852
	256	0.05556
	260	0.01852
	268	0.00926
	270	0.00926
ZT13	N	51
	174	0.18627
	176	0.02941
	178	0.37255
	180	0.23529
	182	0.09804
	184	0.07843
ZM25	N	51
	130	0.01961
	136	0.04902
	138	0.09804
	142	0.07843
	144	0.06863
	150	0.02941
	152	0.0098
	156	0.0098
	170	0.41176
	172	0.0098
	178	0.0098
	180	0.05882
	186	0.0098
	188	0.0098
	216	0.02941
	260	0.0098
	268	0.05882
	324	0.02941
zm40	N	55
	214	0.01818
	220	0.01818
	260	0.01818
	266	0.03636
	274	0.01818
	276	0.00909
	296	0.06364
	298	0.00909
	300	0.26364
	308	0.00909
	320	0.01818
	336	0.00909
	364	0.00909
	368	0.03636
	370	0.00909
	374	0.20909
	376	0.00909
	378	0.00909
	380	0.02727
	384	0.00909
	390	0.00909
	394	0.18182
zm35	N	56
	206	0.00893
	214	0.17857
	217	0.00893
	218	0.04464
	236	0.08036
	266	0.00893
	270	0.02679
	290	0.00893
	292	0.00893
	294	0.00893
	300	0.125
	308	0.00893
	312	0.01786
	314	0.00893
	328	0.00893
	351	0.00893
	352	0.00893
	370	0.125
	374	0.125
	380	0.00893
	388	0.00893
	394	0.16071
Warning! Results should be treated with caution given the following:
There is 8% missing data at the locus 'zm36' in the population 'Pop1!
There is 10% missing data at the locus 'ZT13' in the population 'Pop1!
There is 10% missing data at the locus 'ZM25' in the population 'Pop1!

## Sheet: AGL
Allele Frequencies by Population with Graph over Loci for Codominant Data
Data Sheet	AQ_Rice D
Data Title	AQtemplate
No. Loci	11
No. Samples	57
No. Pops.	1
Allele Frequencies by Populations
Locus	Allele	Pop1
zm30	214	0.5
	262	0.00877
	264	0.09649
	266	0.05263
	274	0.01754
	284	0.28947
	292	0.02632
	298	0.00877
zt18	98	0.10909
	100	0.87273
	122	0.00909
	128	0.00909
zm26	178	0.49107
	180	0.50893
zt1	258	0.00909
	264	0.02727
	266	0.03636
	270	0.10909
	274	0.07273
	296	0.03636
	298	0.00909
	300	0.17273
	302	0.00909
	308	0.00909
	310	0.00909
	312	0.00909
	326	0.00909
	328	0.00909
	332	0.00909
	346	0.00909
	352	0.00909
	370	0.1
	374	0.01818
	376	0.09091
	380	0.02727
	388	0.01818
	390	0.00909
	394	0.18182
zm44	208	0.00893
	214	0.14286
	250	0.84821
zm36	214	0.5
	216	0.00962
	224	0.00962
	232	0.00962
	250	0.00962
	266	0.31731
	274	0.01923
	278	0.00962
	298	0.00962
	300	0.00962
	320	0.00962
	326	0.00962
	370	0.02885
	374	0.01923
	394	0.01923
	396	0.00962
Zt22	170	0.00926
	178	0.00926
	194	0.21296
	196	0.00926
	200	0.02778
	202	0.2037
	210	0.01852
	212	0.00926
	216	0.03704
	218	0.00926
	220	0.0463
	222	0.03704
	224	0.02778
	226	0.05556
	230	0.02778
	236	0.03704
	238	0.0463
	246	0.01852
	248	0.00926
	252	0.03704
	254	0.01852
	256	0.05556
	260	0.01852
	268	0.00926
	270	0.00926
ZT13	174	0.18627
	176	0.02941
	178	0.37255
	180	0.23529
	182	0.09804
	184	0.07843
ZM25	130	0.01961
	136	0.04902
	138	0.09804
	142	0.07843
	144	0.06863
	150	0.02941
	152	0.0098
	156	0.0098
	170	0.41176
	172	0.0098
	178	0.0098
	180	0.05882
	186	0.0098
	188	0.0098
	216	0.02941
	260	0.0098
	268	0.05882
	324	0.02941
zm40	214	0.01818
	220	0.01818
	260	0.01818
	266	0.03636
	274	0.01818
	276	0.00909
	296	0.06364
	298	0.00909
	300	0.26364
	308	0.00909
	320	0.01818
	336	0.00909
	364	0.00909
	368	0.03636
	370	0.00909
	374	0.20909
	376	0.00909
	378	0.00909
	380	0.02727
	384	0.00909
	390	0.00909
	394	0.18182
zm35	206	0.00893
	214	0.17857
	217	0.00893
	218	0.04464
	236	0.08036
	266	0.00893
	270	0.02679
	290	0.00893
	292	0.00893
	294	0.00893
	300	0.125
	308	0.00893
	312	0.01786
	314	0.00893
	328	0.00893
	351	0.00893
	352	0.00893
	370	0.125
	374	0.125
	380	0.00893
	388	0.00893
	394	0.16071
Warning! Results should be treated with caution given the following:
There is 8% missing data at the locus 'zm36' in the population 'Pop1!
There is 10% missing data at the locus 'ZT13' in the population 'Pop1!
There is 10% missing data at the locus 'ZM25' in the population 'Pop1!

## Sheet: AFL
Allele Frequencies by Locus for Codominant Data
Data Sheet	AQ_Rice D
Data Title	AQtemplate
No. Loci	11
No. Samples	57
No. Pops.	1
Allele Frequencies and Sample Size by Locus
Pop	Allele/n	zm30	zt18	zm26	zt1	zm44	zm36	Zt22	ZT13	ZM25	zm40	zm35
Pop1	N	57	55	56	55	56	52	54	51	51	55	56
	98		0.10909
	100		0.87273
	122		0.00909
	128		0.00909
	130									0.01961
	136									0.04902
	138									0.09804
	142									0.07843
	144									0.06863
	150									0.02941
	152									0.0098
	156									0.0098
	170							0.00926		0.41176
	172									0.0098
	174								0.18627
	176								0.02941
	178			0.49107				0.00926	0.37255	0.0098
	180			0.50893					0.23529	0.05882
	182								0.09804
	184								0.07843
	186									0.0098
	188									0.0098
	194							0.21296
	196							0.00926
	200							0.02778
	202							0.2037
	206											0.00893
	208					0.00893
	210							0.01852
	212							0.00926
	214	0.5				0.14286	0.5				0.01818	0.17857
	216						0.00962	0.03704		0.02941
	217											0.00893
	218							0.00926				0.04464
	220							0.0463			0.01818
	222							0.03704
	224						0.00962	0.02778
	226							0.05556
	230							0.02778
	232						0.00962
	236							0.03704				0.08036
	238							0.0463
	246							0.01852
	248							0.00926
	250					0.84821	0.00962
	252							0.03704
	254							0.01852
	256							0.05556
	258				0.00909
	260							0.01852		0.0098	0.01818
	262	0.00877
	264	0.09649			0.02727
	266	0.05263			0.03636		0.31731				0.03636	0.00893
	268							0.00926		0.05882
	270				0.10909			0.00926				0.02679
	274	0.01754			0.07273		0.01923				0.01818
	276										0.00909
	278						0.00962
	284	0.28947
	290											0.00893
	292	0.02632										0.00893
	294											0.00893
	296				0.03636						0.06364
	298	0.00877			0.00909		0.00962				0.00909
	300				0.17273		0.00962				0.26364	0.125
	302				0.00909
	308				0.00909						0.00909	0.00893
	310				0.00909
	312				0.00909							0.01786
	314											0.00893
	320						0.00962				0.01818
	324									0.02941
	326				0.00909		0.00962
	328				0.00909							0.00893
	332				0.00909
	336										0.00909
	346				0.00909
	351											0.00893
	352				0.00909							0.00893
	364										0.00909
	368										0.03636
	370				0.1		0.02885				0.00909	0.125
	374				0.01818		0.01923				0.20909	0.125
	376				0.09091						0.00909
	378										0.00909
	380				0.02727						0.02727	0.00893
	384										0.00909
	388				0.01818							0.00893
	390				0.00909						0.00909
	394				0.18182		0.01923				0.18182	0.16071
	396						0.00962
Warning! Results should be treated with caution given the following:
There is 8% missing data at the locus 'zm36' in the population 'Pop1!
There is 10% missing data at the locus 'ZT13' in the population 'Pop1!
There is 10% missing data at the locus 'ZM25' in the population 'Pop1!

## Sheet: HFP
Heterozygosity, Fstatistics and Polymorphism by Population for Codominant Data
Data Sheet	AQ_Rice D
Data Title	AQtemplate
No. Loci	11
No. Samples	57
No. Pops.	1
Sample Size, No. Alleles, No. Effective Alleles, Information Index, Observed Heterozygosity, Expected and Unbiased Expected Heterozygosity, and Fixation Index
Pop	Locus	N	Na	Ne	I	Ho	He	uHe	F
Pop1	zm30	57	8	2.8816	1.33578	1	0.65297	0.658749	-0.531464
	zt18	55	4	1.29246	0.445968	0.145455	0.226281	0.228357	0.357195
	zm26	56	2	1.99936	0.692988	0.982143	0.499841	0.504344	-0.964912
	zt1	55	24	9.60317	2.58984	0.727273	0.895868	0.904087	0.188192
	zm44	56	3	1.35143	0.459751	0.232143	0.260045	0.262387	0.107296
	zm36	52	16	2.82845	1.48762	0.961538	0.64645	0.652726	-0.487414
	Zt22	54	25	9.3312	2.68835	0.703704	0.892833	0.901177	0.21183
	ZT13	51	6	4.07361	1.55239	0.313725	0.754517	0.761988	0.584204
	ZM25	51	18	4.92614	2.16334	0.686275	0.797001	0.804892	0.138929
	zm40	55	22	6.40212	2.29483	0.8	0.843802	0.851543	0.0519099
	zm35	56	22	8.68698	2.43916	0.839286	0.884885	0.892857	0.0515315
Mean and SE over Loci for each Pop
Pop		N	Na	Ne	I	Ho	He	uHe	F
Pop1	Mean	54.3636	13.6364	4.85241	1.65	0.671958	0.66859	0.674828	-0.0266093
	SE	0.636364	2.75111	0.960101	0.255493	0.0922113	0.0735498	0.0742433	0.135802
Percentage of Polymorphic Loci
Population	%P
Pop1	1
Na = No. of Different Alleles
Ne = No. of Effective Alleles = 1 / (Sum pi^2)
I = Shannon's Information Index = -1* Sum (pi * Ln (pi))
Ho = Observed Heterozygosity = No. of Hets / N
He = Expected Heterozygosity = 1 - Sum pi^2
uHe = Unbiased Expected Heterozygosity = (2N / (2N-1)) * He
F = Fixation Index = (He - Ho) / He = 1 - (Ho / He)
Where pi is the frequency of the ith allele for the population & Sum pi^2 is the sum of the squared population allele frequencies.
Warning! Results should be treated with caution given the following:
There is 8% missing data at the locus 'zm36' in the population 'Pop1!
There is 10% missing data at the locus 'ZT13' in the population 'Pop1!
There is 10% missing data at the locus 'ZM25' in the population 'Pop1!

## Sheet: HFL
Heterozygosity, Fstatistics and Polymorphism by Locus for Codominant Data
Data Sheet	AQ_Rice D
Data Title	AQtemplate
No. Loci	11
No. Samples	57
No. Pops.	1
Sample Size, No. Alleles, No. Effective Alleles, Information Index, Observed Heterozygosity, Expected and Unbiased Expected Heterozygosity, and Fixation Index
Pop		zm30	zt18	zm26	zt1	zm44	zm36	Zt22	ZT13	ZM25	zm40	zm35
Pop1	N	57	55	56	55	56	52	54	51	51	55	56
	Na	8	4	2	24	3	16	25	6	18	22	22
	Ne	2.8816	1.29246	1.99936	9.60317	1.35143	2.82845	9.3312	4.07361	4.92614	6.40212	8.68698
	I	1.33578	0.445968	0.692988	2.58984	0.459751	1.48762	2.68835	1.55239	2.16334	2.29483	2.43916
	Ho	1	0.145455	0.982143	0.727273	0.232143	0.961538	0.703704	0.313725	0.686275	0.8	0.839286
	He	0.65297	0.226281	0.499841	0.895868	0.260045	0.64645	0.892833	0.754517	0.797001	0.843802	0.884885
	uHe	0.658749	0.228357	0.504344	0.904087	0.262387	0.652726	0.901177	0.761988	0.804892	0.851543	0.892857
	F	-0.531464	0.357195	-0.964912	0.188192	0.107296	-0.487414	0.21183	0.584204	0.138929	0.0519099	0.0515315
Grand Mean and SE over Pops and Loci
		Total
N	Mean	54.3636
	SE	0.636364
Na	Mean	13.6364
	SE	2.75111
Ne	Mean	4.85241
	SE	0.960101
I	Mean	1.65
	SE	0.255493
Ho	Mean	0.671958
	SE	0.0922113
He	Mean	0.66859
	SE	0.0735498
uHe	Mean	0.674828
	SE	0.0742433
F	Mean	-0.0266093
	SE	0.135802
Percentage of Polymorphic Loci
Population	%P
Pop1	1
Na = No. of Different Alleles
Ne = No. of Effective Alleles = 1 / (Sum pi^2)
I = Shannon's Information Index = -1* Sum (pi * Ln (pi))
Ho = Observed Heterozygosity = No. of Hets / N
He = Expected Heterozygosity = 1 - Sum pi^2
uHe = Unbiased Expected Heterozygosity = (2N / (2N-1)) * He
F = Fixation Index = (He - Ho) / He = 1 - (Ho / He)
Where pi is the frequency of the ith allele for the population & Sum pi^2 is the sum of the squared population allele frequencies.
Warning! Results should be treated with caution given the following:
There is 8% missing data at the locus 'zm36' in the population 'Pop1!
There is 10% missing data at the locus 'ZT13' in the population 'Pop1!
There is 10% missing data at the locus 'ZM25' in the population 'Pop1!

[truncated: 15 more sheets: APT, ALI, PA_Rice D, HWE PI, HWE HW, HWE HWS, AFP (2), AGL (2), AFL (2), HFP (2), HFL (2), APT (2), ALI (2), PI, NewOriginal]
